# Supplementary material for: Polyphenylenepyridyl dendrimers as stabilizing and controlling agents for CdS nanoparticle formation
Source: Royal Society of Chemistry journal article supplement (doi:10.1039/c2nr12086k), 2012-01-01
Supplement: c2nr12086k.pdf [file c2nr12086k.pdf]

## Electronic Supplementary Information

# Polyphenylenepyridyl Dendrimers as Stabilizing and Controlling Agents for CdS Nanoparticle Formation

*Nina V. Kuchkina , David Gene Morgan, Barry D. Stein, Lada N. Puntus, Alexander M. Sergeev,  
Alexander S. Peregudov, Lyudmila M. Bronstein, Zinaida B. Shifrina*

### Influence of the reaction conditions on the CdS NP formation

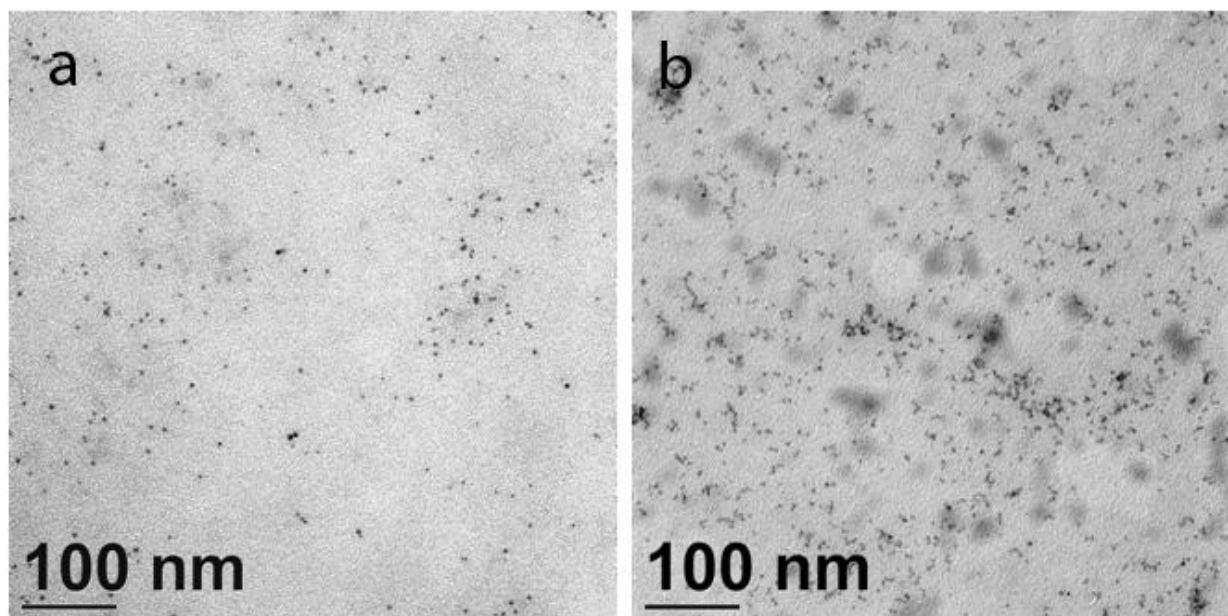

**Figure S1.** TEM images of CdS NPs formed in the presence of tetra-PPPDs at the dendrimer concentration of 0.85 mmol/L and the molar ratios N:Cd:S=1:0.1:1 (a, DNC-1) and N:Cd:S=1:0.3:3 (b, DNC-3).

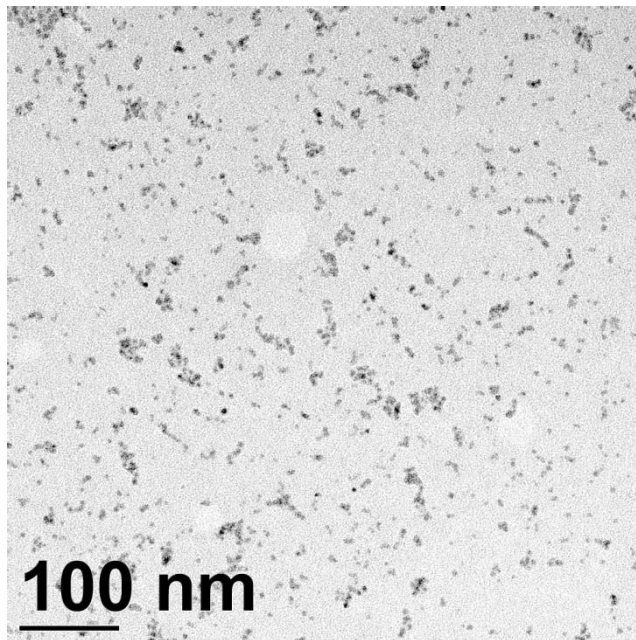

**Figure S2.** TEM image of CdS NPs formed in the presence of tri-PPDs at the dendrimer concentration of 0.85 mmol/L and the molar ratio N:Cd:S=1:0.2:2 (DNC-5).

## Complexation of CdO with tetra-PPPD

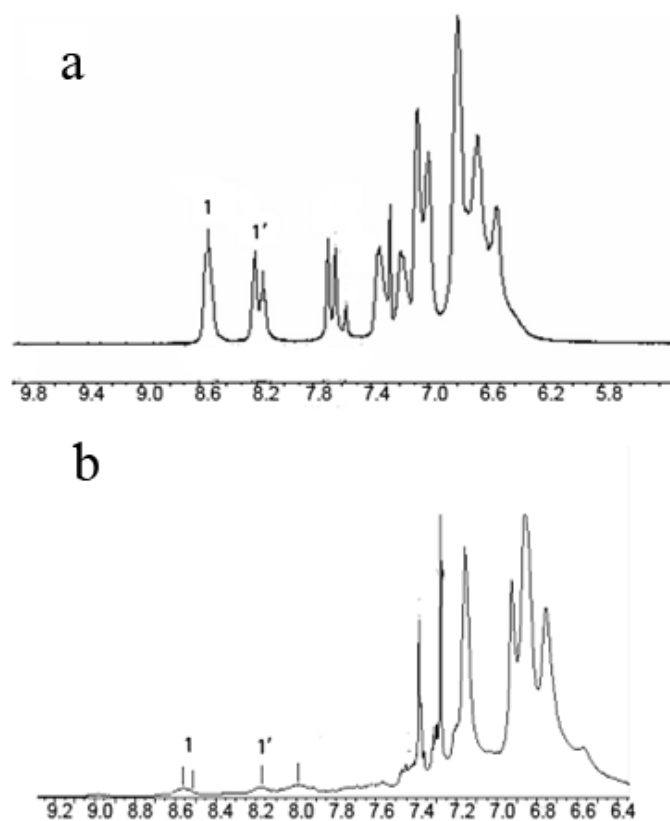

**Figure S3.** <sup>1</sup>H NMR spectra of tetra-PPPD (a) and CdO/tetra-PPPD (b). Signals with notations 1 and 1' are from α-protons of pyridine fragments.

## Optical Properties of CdS/PPPD Nanocomposites

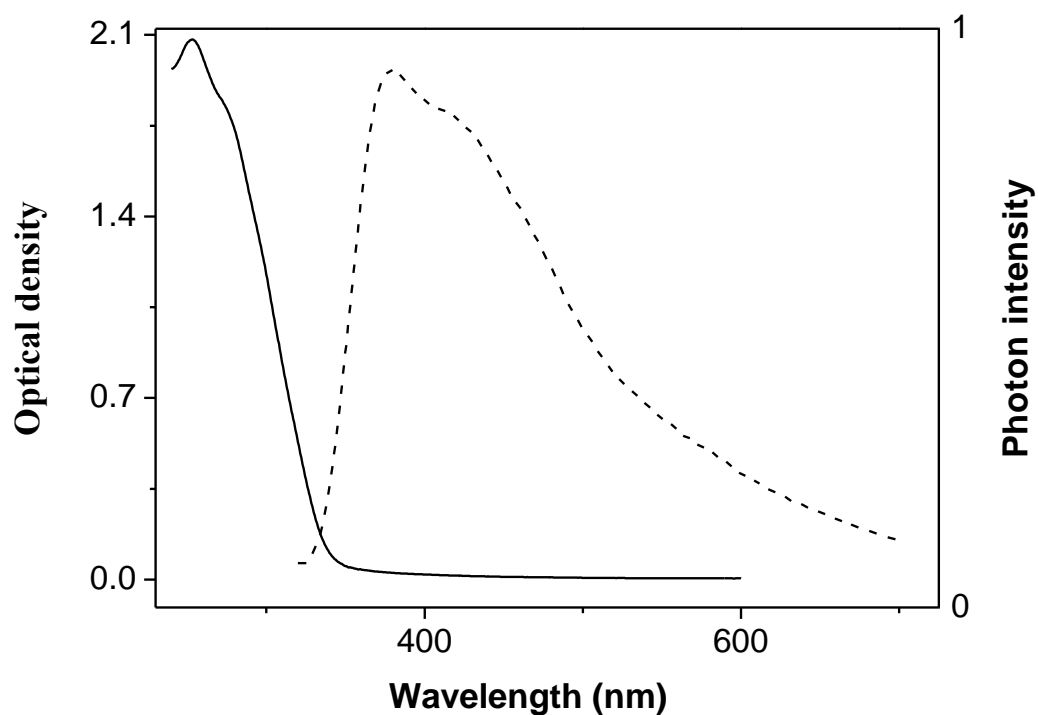

**Figure S4.** Absorption (left) and fluorescence (right) spectra of tetra-PPPD in chloroform at room temperature (the solution concentration of  $1.6 \times 10^{-5} \text{M}$ , the solvent layer  $L=0.2 \text{cm}$ ).

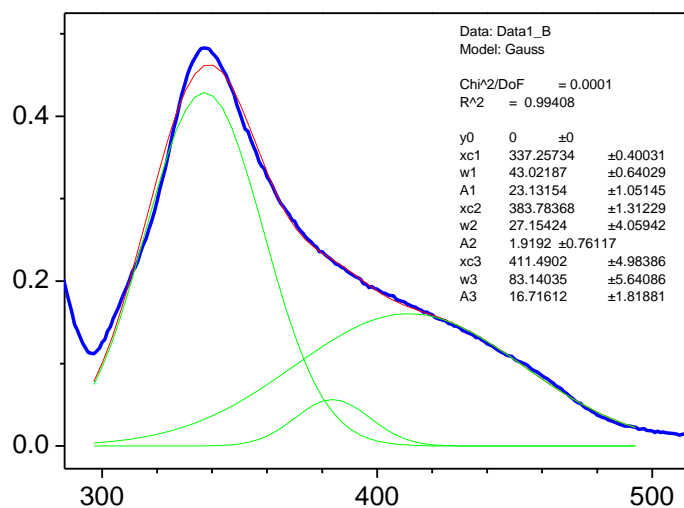

**Figure S5.** Multi-peak fitting performed for the absorption difference spectrum

## Nanocomposite of CdS/PPD and Block Copolymer

Poly(styrene-*b*-acrylic acid) block copolymer, PS(15,000)-*b*-PAA(3,600), with  $M_w/M_n=1.2$  was purchased from Polymer Source, INC and used as received. In a typical experiment, a stock solution of 5 mg of PS-*b*-PAA in 10 mL of THF has been prepared by stirring overnight (solution 1). Solution 2 has been prepared by 5 min sonication of 3.5 mg of DNC-7 in 1 mL of THF. Then 0.5 mL of solution 2 was mixed with 0.5 mL of solution 1 and stirred for 1 hr. Then THF was evaporated in vacuum and 1 mL of dionized water and 0.1 mL THF were added into the vial. The vial was sonicated for 15 min giving a turbid yellow solution. TEM image of this sample is presented in Figure S5.

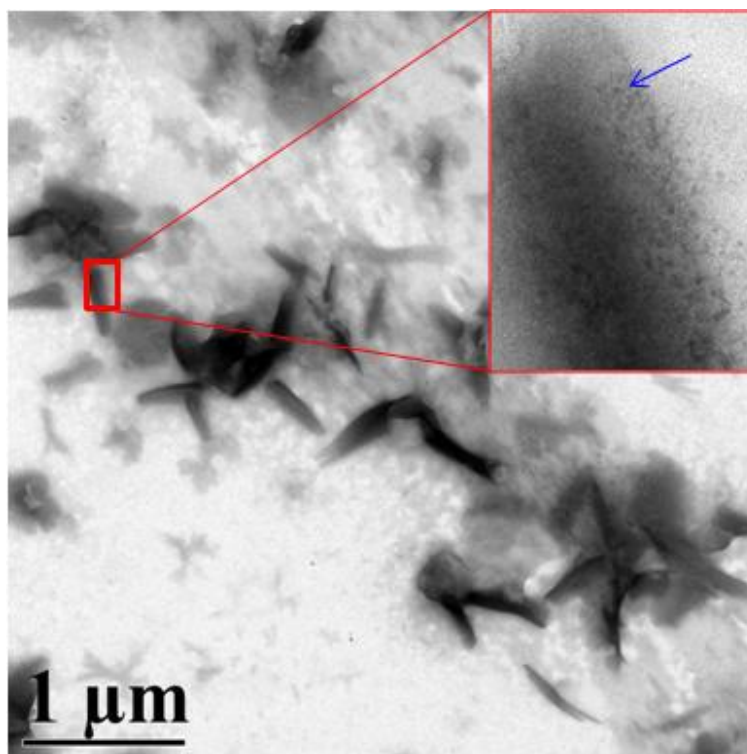

**Figure S6.** TEM image of DNC-7/PS-*b*-PAAA. Inset shows a higher magnification image displaying QDs incorporated in larger structures. The blue arrow shows CdS QDs.
